# Supplementary material for: Sarcoidosis activates diverse transcriptional programs in bronchoalveolar lavage cells
Source: PubMed Central journal article supplement (PMC4962428; doi:10.1186/s12931-016-0411-y), 2016-07-26

Control (N = 12)      Sarcoidosis (N = 15)

**GSEA:**  
relative enrichment of ~ 1300  
canonical pathways between  
control and sarcoidosis subjects  
statistically evaluated

**Enrichment Map:**  
GSEA map displays relationships  
among enriched (up-regulated)  
pathways in sarcoidosis patients  
relative to controls

**Overview of Analytic Approach for  
Pathway Enrichment and Network  
Analysis in Sarcoidosis**

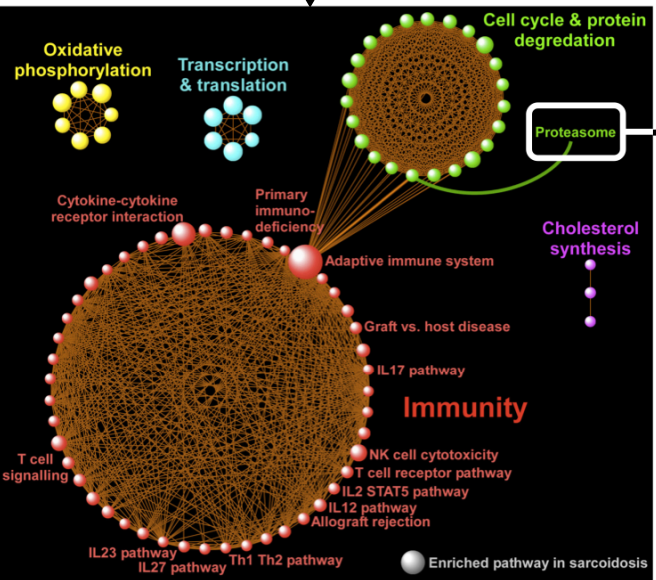

**Network Analysis:**  
Connectivity between gene  
members of Proteasome, an  
enriched pathway in sarcoidosis,  
was determined based on  
previously published gene  
product interactions obtained  
from available resources  
including Ingenuity and STRING

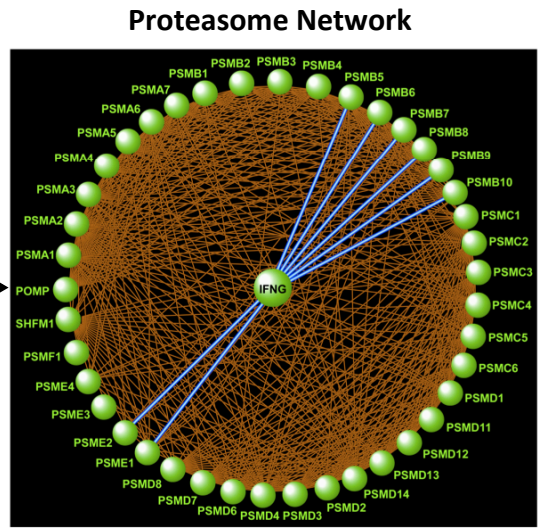

Supplement: 12931_2016_411_MOESM1_ESM.pdf [file 12931_2016_411_MOESM1_ESM.pdf]
