# Supplementary material for: Sarcoidosis activates diverse transcriptional programs in bronchoalveolar lavage cells
Source: PubMed Central journal article supplement (PMC4962428; doi:10.1186/s12931-016-0411-y), 2016-07-26
Supplement: 12931_2016_411_MOESM2_ESM.pdf [file 12931_2016_411_MOESM2_ESM.pdf]

Additional file 2: Table S1 Detailed subject demographics and BAL cell counts

| Subject | Gender | Age | Race | Smoking | Stage | Mac (%) | Lymph (%) | Pmn (%) | Eos (%) | FVC (%) | Affected organs             | Oral steroid at time of bronch |
|---------|--------|-----|------|---------|-------|---------|-----------|---------|---------|---------|-----------------------------|--------------------------------|
| Sarc 1  | M      | 52  | AA   | Former  | 3     | 68      | 32        | 0       | 0       | 79      | skin, lungs                 | No                             |
| Sarc 2  | F      | 32  | AA   | Former  | 3     | 67      | 30        | 3       | 0       | 77      | lungs                       | No                             |
| Sarc 3  | F      | 39  | AA   | Never   | 2     | 89      | 10        | 1       | 0       | 60      | LN's, lungs                 | No                             |
| Sarc 4  | F      | 61  | AA   | Never   | NA    | 64      | 35        | 1       | 0       | 68      | LN's, lungs                 | No                             |
| Sarc 5  | M      | 57  | AA   | Former  | 3     | 95      | 4         | 0       | 1       | 56      | lungs                       | No                             |
| Sarc 6  | M      | 68  | AA   | Never   | 4     | 86      | 14        | 0       | 0       | 107     | LN's, lungs                 | No                             |
| Sarc 7  | F      | 62  | AA   | Never   | 0     | 53      | 47        | 0       | 0       | 85      | lung, skin                  | No                             |
| Sarc 8  | M      | 34  | AA   | Never   | 2     | 91      | 8         | 1       | 0       | 77      | skin, lungs, LN             | No                             |
| Sarc 9  | F      | 47  | AA   | Former  | 4     | 97      | 3         | 0       | 0       | 93      | lungs, liver, spleen, lungs | No                             |
| Sarc 10 | M      | 48  | AA   | Never   | 2     | 61      | 37        | 2       | 0       | NA      | lung, skin                  | No                             |
| Sarc 11 | F      | 53  | C    | Never   | 2     | 96      | 4         | 0       | 0       | 93      | lungs, LN,joints            | No                             |
| Sarc 12 | F      | 39  | AA   | Never   | 2     | 70      | 30        | 0       | 0       | 56      | lungs, cardiac, skin        | No                             |
| Sarc 13 | F      | 42  | AA   | Former  | 1     | 85      | 15        | 0       | 0       | 63      | LN's, lungs                 | No                             |
| Sarc 14 | F      | 46  | AA   | Never   | 2     | 67      | 9         | 24      | 0       | NA      | lungs                       | Yes                            |
| Sarc 15 | M      | 49  | AA   | Former  | 2     | 94      | 5         | 0       | 1       | 66      | lungs, LN's                 | Yes                            |
| Cont 1  | M      | 27  | AA   | Never   | —     | 92      | 5         | 3       | 0       | —       | —                           | —                              |
| Cont 2  | M      | 28  | AA   | Never   | —     | 98      | 2         | 0       | 0       | —       | —                           | —                              |
| Cont 3  | F      | 51  | C    | Never   | —     | 92      | 8         | 0       | 0       | —       | —                           | —                              |
| Cont 4  | F      | 31  | AA   | Never   | —     | 92      | 8         | 0       | 0       | —       | —                           | —                              |
| Cont 5  | F      | 26  | AA   | Never   | —     | 91      | 4         | 3       | 2       | —       | —                           | —                              |
| Cont 6  | F      | 24  | AA   | Never   | —     | 95      | 5         | 0       | 0       | —       | —                           | —                              |
| Cont 7  | F      | 28  | AA   | Never   | —     | 98      | 1         | 0       | 1       | —       | —                           | —                              |
| Cont 8  | M      | 28  | C    | Never   | —     | 98      | 2         | 0       | 0       | —       | —                           | —                              |
| Cont 9  | F      | 26  | AA   | Never   | —     | 98      | 2         | 0       | 0       | —       | —                           | —                              |
| Cont 10 | F      | 27  | AA   | Never   | —     | 97      | 3         | 0       | 0       | —       | —                           | —                              |
| Cont 11 | M      | 30  | AA   | Never   | —     | 95      | 5         | 0       | 0       | —       | —                           | —                              |
| Cont 12 | F      | 35  | AA   | Never   | —     | 93      | 7         | 0       | 0       | —       | —                           | —                              |
