# Supplementary material for: Sarcoidosis activates diverse transcriptional programs in bronchoalveolar lavage cells
Source: PubMed Central journal article supplement (PMC4962428; doi:10.1186/s12931-016-0411-y), 2016-07-26
Supplement: 12931_2016_411_MOESM3_ESM.pdf [file 12931_2016_411_MOESM3_ESM.pdf]

**Additional file 3: Table S2** List of significantly upregulated gene sets in BAL cells of sarcoidosis patients. Note that no gene sets were downregulated at the FDR < 1% threshold.

| Upregulated gene set                                                                                              | Number of genes | FDR    |
|-------------------------------------------------------------------------------------------------------------------|-----------------|--------|
| PID_IL12_2PATHWAY                                                                                                 | 62              | 0      |
| REACTOME_RESPIRATORY_ELECTRON_TRANSPORT_ATP_SYNTHESIS_BY_CHEMIOSMOTIC_COUPLING_AND_HEAT_PRODUCTION                | 74              | 0      |
| REACTOME_RESPIRATORY_ELECTRON_TRANSPORT                                                                           | 58              | 0      |
| PID_CD8TCRPATHWAY                                                                                                 | 49              | 0      |
| BIOCARTA_NO2IL12_PATHWAY                                                                                          | 17              | 0      |
| KEGG_PARKINSONS_DISEASE                                                                                           | 102             | 0      |
| PID_CD8TCRDOWNSTREAMPATHWAY                                                                                       | 62              | 0      |
| KEGG_OXIDATIVE_PHOSPHORYLATION                                                                                    | 103             | 0      |
| REACTOME_IMMUNOREGULATORY_INTERACTIONS_BETWEEN_A_LYMPHOID_AND_A_NON_LYMPHOID_CELL                                 | 58              | 0      |
| KEGG_ALLOGRAFT_REJECTION                                                                                          | 34              | 0      |
| REACTOME_TCA_CYCLE_AND_RESPIRATORY_ELECTRON_TRANSPORT                                                             | 107             | 0      |
| BIOCARTA_IL12_PATHWAY                                                                                             | 21              | 0      |
| REACTOME_ER_PHAGOSOME_PATHWAY                                                                                     | 57              | 0      |
| REACTOME_CHOLESTEROL_BIOSYNTHESIS                                                                                 | 20              | 0      |
| KEGG_GRAFT_VERSUS_HOST_DISEASE                                                                                    | 37              | 0      |
| ST_T_CELL_SIGNAL_TRANSDUCTION                                                                                     | 43              | 0      |
| BIOCARTA_NKT_PATHWAY                                                                                              | 29              | 0      |
| REACTOME_CHEMOKINE_RECEPTORS_BIND_CHEMOKINES                                                                      | 50              | 0      |
| BIOCARTA_TCR_PATHWAY                                                                                              | 11              | 0      |
| REACTOME_TRANSLOCATION_OF_ZAP_70_TO_IMMUNOLOGICAL_SYNAPSE                                                         | 11              | 0      |
| KEGG_CYTOKINE_CYTOKINE_RECEPTOR_INTERACTION                                                                       | 237             | 0      |
| REACTOME_TCR_SIGNALING                                                                                            | 47              | 0      |
| KEGG_RIBOSOME                                                                                                     | 86              | 0.0001 |
| BIOCARTA_TOB1_PATHWAY                                                                                             | 19              | 0.0001 |
| REACTOME_GENERATION_OF_SECOND_MESSENGER_MOLECULES                                                                 | 24              | 0.0001 |
| REACTOME_PEPTIDE_CHAIN_ELONGATION                                                                                 | 85              | 0.0001 |
| KEGG_AUTOIMMUNE_THYROID_DISEASE                                                                                   | 48              | 0.0001 |
| REACTOME_APC_C_CDC20_MEDIATED_DEGRADATION_OF_MITOTIC_PROTEINS                                                     | 60              | 0.0001 |
| PID_IL23PATHWAY                                                                                                   | 35              | 0.0001 |
| REACTOME_SRP_DEPENDENT_COTRANSLATIONAL_PROTEIN_TARGETING_TO_MEMBRANE                                              | 106             | 0.0001 |
| REACTOME_AUTODEGRADATION_OF_CDH1_BY_CDH1_APC_C                                                                    | 52              | 0.0001 |
| PID_IL12_STAT4PATHWAY                                                                                             | 33              | 0.0001 |
| REACTOME_PHOSPHORYLATION_OF_CD3_AND_TCR_ZETA_CHAINS                                                               | 12              | 0.0001 |
| PID_NFAT_TFPATHWAY                                                                                                | 45              | 0.0001 |
| BIOCARTA_TH1TH2_PATHWAY                                                                                           | 19              | 0.0001 |
| KEGG_T_CELL_RECEPTOR_SIGNALING_PATHWAY                                                                            | 104             | 0.0002 |
| KEGG_STEROID_BIOSYNTHESIS                                                                                         | 16              | 0.0002 |
| REACTOME_SCF5P2_MEDIATED_DEGRADATION_OF_P27_P21                                                                   | 53              | 0.0002 |
| REACTOME_VIF_MEDIATED_DEGRADATION_OF_APOBEC3G                                                                     | 48              | 0.0002 |
| KEGG_PRIMARY_IMMUNODEFICIENCY                                                                                     | 34              | 0.0002 |
| BIOCARTA_TCYTOTOXIC_PATHWAY                                                                                       | 12              | 0.0002 |
| PID_TCR_PATHWAY                                                                                                   | 60              | 0.0002 |
| REACTOME_REGULATION_OF_MITOTIC_CELL_CYCLE                                                                         | 72              | 0.0003 |
| BIOCARTA_CTL_PATHWAY                                                                                              | 13              | 0.0003 |
| KEGG_NATURAL_KILLER_CELL_MEDIATED_CYTOTOXICITY                                                                    | 123             | 0.0003 |
| REACTOME_CYCLIN_E_ASSOCIATED_EVENTS_DURING_G1_S_TRANSITION                                                        | 62              | 0.0004 |
| BIOCARTA_TCAPOPTOSIS_PATHWAY                                                                                      | 9               | 0.0004 |
| REACTOME_APC_C_CDH1_MEDIATED_DEGRADATION_OF_CDC20_AND_OTHER_APC_C_CDH1_TARGETED_PROTEINS_IN_LATE_MITOSIS_EARLY_G1 | 59              | 0.0006 |
| BIOCARTA_CTLA4_PATHWAY                                                                                            | 19              | 0.0006 |
| KEGG_PROTEASOME                                                                                                   | 42              | 0.0006 |
| KEGG_INTESTINAL_IMMUNE_NETWORK_FOR_IGA_PRODUCTION                                                                 | 42              | 0.0007 |
| PID_IL2_STAT5PATHWAY                                                                                              | 30              | 0.0008 |
| REACTOME_INFLUENZA_VIRAL_RNA_TRANSCRIPTION_AND_REPLICATION                                                        | 101             | 0.0010 |
| BIOCARTA_ASBCCELL_PATHWAY                                                                                         | 12              | 0.0010 |
| REACTOME_SCF_BETA_TRCP_MEDIATED_DEGRADATION_OF_EMI1                                                               | 48              | 0.0014 |
| REACTOME_REGULATION_OF_ORNITHINE_DECARBOXYLASE_ODC                                                                | 47              | 0.0015 |
| BIOCARTA_TCR_PATHWAY                                                                                              | 43              | 0.0016 |
| KEGG_ALZHEIMERS_DISEASE                                                                                           | 147             | 0.0020 |
| BIOCARTA_STATHMIN_PATHWAY                                                                                         | 18              | 0.0021 |
| REACTOME_CDK_MEDIATED_PHOSPHORYLATION_AND_REMOVAL_OF_CDC6                                                         | 45              | 0.0021 |
| BIOCARTA_CSK_PATHWAY                                                                                              | 22              | 0.0023 |
| BIOCARTA_THELPER_PATHWAY                                                                                          | 12              | 0.0027 |
| REACTOME_CDT1_ASSOCIATION_WITH_THE_CDC6_ORC_ORIGIN_COMPLEX                                                        | 52              | 0.0027 |
| REACTOME_G1_S_TRANSITION                                                                                          | 105             | 0.0028 |

|                                                                        |     |        |
|------------------------------------------------------------------------|-----|--------|
| BIOCARTA_IL17_PATHWAY                                                  | 15  | 0.0028 |
| KEGG_TERPENOID_BACKBONE_BIOSYNTHESIS                                   | 14  | 0.0034 |
| REACTOME_DOWNSTREAM_TCR_SIGNALING                                      | 31  | 0.0034 |
| KEGG_TYPE_I_DIABETES_MELLITUS                                          | 40  | 0.0036 |
| REACTOME_ANTIGEN_PROCESSING_CROSS_PRESENTATION                         | 71  | 0.0036 |
| REACTOME_CELL_CYCLE_CHECKPOINTS                                        | 103 | 0.0040 |
| REACTOME_PD1_SIGNALING                                                 | 14  | 0.0042 |
| REACTOME_ADAPTIVE_IMMUNE_SYSTEM                                        | 453 | 0.0047 |
| REACTOME_DESTABILIZATION_OF_MRNA_BY_AUF1_HNRNP_D0                      | 48  | 0.0053 |
| REACTOME_RIP_MEDIATED_NFKB_ACTIVATION_VIA_DAI                          | 17  | 0.0062 |
| PID_IL27PATHWAY                                                        | 25  | 0.0069 |
| REACTOME_AUTODEGRADATION_OF_THE_E3_UBIQUITIN_LIGASE_COP1               | 45  | 0.0069 |
| REACTOME_ORC1_REMOVAL_FROM_CHROMATIN                                   | 63  | 0.0070 |
| REACTOME_M_G1_TRANSITION                                               | 76  | 0.0070 |
| KEGG_HEMATOPOIETIC_CELL_LINEAGE                                        | 85  | 0.0072 |
| REACTOME_3_UTR_MEDIATED_TRANSLATIONAL_REGULATION                       | 105 | 0.0074 |
| REACTOME_P53_INDEPENDENT_G1_S_DNA_DAMAGE_CHECKPOINT                    | 47  | 0.0077 |
| REACTOME_P53_DEPENDENT_G1_DNA_DAMAGE_RESPONSE                          | 51  | 0.0087 |
| KEGG_HUNTINGTONS_DISEASE                                               | 156 | 0.0092 |
| REACTOME_MITOTIC_G1_G1_S_PHASES                                        | 126 | 0.0097 |
| REACTOME_NONSENSE_MEDIATED_DECAY_ENHANCED_BY_THE_EXON_JUNCTION_COMPLEX | 104 | 0.0098 |
| REACTOME_THE_ROLE_OF_NEF_IN_HIV1_REPLICATION_AND_DISEASE_PATHOGENESIS  | 25  | 0.0099 |
