# Supplementary material for: Sarcoidosis activates diverse transcriptional programs in bronchoalveolar lavage cells
Source: PubMed Central journal article supplement (PMC4962428; doi:10.1186/s12931-016-0411-y), 2016-07-26
Supplement: 12931_2016_411_MOESM5_ESM.pdf [file 12931_2016_411_MOESM5_ESM.pdf]

**Additional file 5: Table S4** List of significantly upregulated and downregulated gene sets in PBLs of sarcoidosis patients at FDR < 1% threshold. Note that several T cell-associated pathways were downregulated in PBLs of sarcoidosis patients.

| <b>Upregulated gene set</b>                                                                                    | <b>Number of genes</b> | <b>FDR</b> |
|----------------------------------------------------------------------------------------------------------------|------------------------|------------|
| REACTOME_INTERFERON_GAMMA_SIGNALING                                                                            | 56                     | 0          |
| REACTOME_INTERFERON_ALPHA_BETA_SIGNALING                                                                       | 62                     | 0          |
| REACTOME_INTERFERON_SIGNALING                                                                                  | 149                    | 0          |
| REACTOME_CYTOKINE_SIGNALING_IN_IMMUNE_SYSTEM                                                                   | 258                    | 0          |
| REACTOME_INNATE_IMMUNE_SYSTEM                                                                                  | 246                    | 0          |
| KEGG_LEISHMANIA_INFECTION                                                                                      | 69                     | 0          |
| KEGG_NEUROACTIVE_LIGAND_RECEPTOR_INTERACTION                                                                   | 267                    | 0          |
| BIOCARTA_COMP_PATHWAY                                                                                          | 18                     | 0          |
| REACTOME_COMPLEMENT_CASCADE                                                                                    | 29                     | 0          |
| KEGG_COMPLEMENT_AND_COAGULATION_CASCADES                                                                       | 68                     | 0          |
| REACTOME_ACTIVATED_TAK1_MEDIATES_P38_MAPK_ACTIVATION                                                           | 16                     | 0          |
| REACTOME_EICOSANOID_LIGAND_BINDING_RECEPTORS                                                                   | 14                     | 0.0003     |
| REACTOME_TOLL_RECEPTOR_CASCADES                                                                                | 112                    | 0.0006     |
| REACTOME_ACTIVATED_TLR4_SIGNALING                                                                              | 89                     | 0.0006     |
| REACTOME_ANTIGEN_PROCESSING_CROSS_PRESENTATION                                                                 | 71                     | 0.0014     |
| PID_UPA_UPAR_PATHWAY                                                                                           | 40                     | 0.0017     |
| KEGG_TOLL_LIKE_RECEPTOR_SIGNALING_PATHWAY                                                                      | 100                    | 0.0017     |
| REACTOME_TAK1_ACTIVATES_NFKB_BY_PHOSPHORYLATION_AND_ACTIVATION_OF_IKKS_COMPLEX                                 | 23                     | 0.0017     |
| KEGG_NOD_LIKE_RECEPTOR_SIGNALING_PATHWAY                                                                       | 61                     | 0.0017     |
| REACTOME_TRIF_MEDIATED_TLR3_SIGNALING                                                                          | 71                     | 0.0018     |
| KEGG_SYSTEMIC_LUPUS_ERYTHEMATOSUS                                                                              | 90                     | 0.0018     |
| PID_IFNG_PATHWAY                                                                                               | 39                     | 0.0019     |
| REACTOME_MYD88_MAL_CASCADE_INITIATED_ON_PLASMA_MEMBRANE                                                        | 79                     | 0.0019     |
| BIOCARTA_CLASSIC_PATHWAY                                                                                       | 13                     | 0.0019     |
| REACTOME_IL1_SIGNALING                                                                                         | 38                     | 0.0019     |
| REACTOME_TRAF6_MEDIATED_INDUCTION_OF_NFKB_AND_MAP_KINASES_UPON_TLR7_8_OR_9_ACTIVATION                          | 73                     | 0.0025     |
| KEGG_NOTCH_SIGNALING_PATHWAY                                                                                   | 47                     | 0.0029     |
| REACTOME_REGULATION_OF_IFNA_SIGNALING                                                                          | 24                     | 0.0030     |
| PID_INTEGRIN_A9B1_PATHWAY                                                                                      | 25                     | 0.0030     |
| REACTOME_ACTIVATED_NOTCH1_TRANSMITS_SIGNAL_TO_THE_NUCLEUS                                                      | 26                     | 0.0031     |
| REACTOME_GPCR_LIGAND_BINDING                                                                                   | 378                    | 0.0031     |
| REACTOME_NFKB_AND_MAP_KINASES_ACTIVATION_MEDIATED_BY_TLR4_SIGNALING_REPERTOIRE                                 | 69                     | 0.0035     |
| REACTOME_RIG_I_MDA5_MEDIATED_INDUCTION_OF_IFN_ALPHA_BETA_PATHWAYS                                              | 71                     | 0.0041     |
| REACTOME_TRAF6_MEDIATED_IRF7_ACTIVATION                                                                        | 30                     | 0.0046     |
| REACTOME_DEGRADATION_OF_THE_EXTRACELLULAR_MATRIX                                                               | 29                     | 0.0047     |
| KEGG_DORSO_VENTRAL_AXIS_FORMATION                                                                              | 23                     | 0.0053     |
| REACTOME_SIGNALING_BY_ILS                                                                                      | 105                    | 0.0053     |
| REACTOME_NUCLEOTIDE_BINDING_DOMAIN_LEUCINE_RICH_REPEAT_CONTAINING_RECEPTOR_NLR_SIGNALING_PATHWAYS              | 43                     | 0.0056     |
| REACTOME_CHONDROITIN_SULFATE_DERMATAN_SULFATE_METABOLISM                                                       | 47                     | 0.0056     |
| REACTOME_GABA_B_RECEPTOR_ACTIVATION                                                                            | 38                     | 0.0066     |
| REACTOME_CHONDROITIN_SULFATE_BIOSYNTHESIS                                                                      | 19                     | 0.0067     |
| REACTOME_GROWTH_HORMONE_RECEPTOR_SIGNALING                                                                     | 24                     | 0.0067     |
| REACTOME_RIP_MEDIATED_NFKB_ACTIVATION_VIA_DAI                                                                  | 18                     | 0.0067     |
| REACTOME_INITIAL_TRIGGERING_OF_COMPLEMENT                                                                      | 13                     | 0.0069     |
| REACTOME_G_ALPHA_I_SIGNALING_EVENTS                                                                            | 184                    | 0.0082     |
| REACTOME_AMYLOIDS                                                                                              | 47                     | 0.0085     |
| REACTOME_EXTRACELLULAR_MATRIX_ORGANIZATION                                                                     | 85                     | 0.0088     |
| <b>Downregulated gene set</b>                                                                                  | <b>Number of genes</b> | <b>FDR</b> |
| REACTOME_TRANSLATION                                                                                           | 142                    | 0          |
| REACTOME_3_UTR_MEDIATED_TRANSLATIONAL_REGULATION                                                               | 102                    | 0          |
| REACTOME_SRP_DEPENDENT_COTRANSLATIONAL_PROTEIN_TARGETING_TO_MEMBRANE                                           | 105                    | 0          |
| REACTOME_PEPTIDE_CHAIN_ELONGATION                                                                              | 82                     | 0          |
| KEGG_RIBOSOME                                                                                                  | 84                     | 0          |
| REACTOME_NONSENSE_MEDIATED_DECAY_ENHANCED_BY_THE_EXON_JUNCTION_COMPLEX                                         | 102                    | 0          |
| REACTOME_INFLUENZA_VIRAL_RNA_TRANSCRIPTION_AND_REPLICATION                                                     | 98                     | 0          |
| REACTOME_INFLUENZA_LIFE_CYCLE                                                                                  | 131                    | 0          |
| REACTOME_METABOLISM_OF_RNA                                                                                     | 247                    | 0          |
| REACTOME_ACTIVATION_OF_THE_MRNA_UPON_BINDING_OF_THE_CAP_BINDING_COMPLEX_AND_EIFS_AND_SUBSEQUENT_BINDING_TO_43S | 54                     | 0          |
| REACTOME_FORMATION_OF_THE_TERNARY_COMPLEX_AND_SUBSEQUENTLY_THE_43S_COMPLEX                                     | 46                     | 0          |
| REACTOME_METABOLISM_OF_MRNA                                                                                    | 203                    | 0          |
| REACTOME_PROCESSING_OF_CAPPED_INTRON_CONTAINING_PRE_MRNA                                                       | 133                    | 0          |
| REACTOME_MRNA_PROCESSING                                                                                       | 153                    | 0          |
| BIOCARTA_TCR_PATHWAY                                                                                           | 42                     | 0          |
| REACTOME_METABOLISM_OF_NON_CODING_RNA                                                                          | 47                     | 0          |

|                                                                                                                             |     |        |
|-----------------------------------------------------------------------------------------------------------------------------|-----|--------|
| REACTOME_METABOLISM_OF_PROTEINS                                                                                             | 408 | 0      |
| REACTOME_GENERIC_TRANSCRIPTION_PATHWAY                                                                                      | 327 | 0.0000 |
| REACTOME_MITOCHONDRIAL_TRNA_AMINOACYLATION                                                                                  | 21  | 0.0000 |
| REACTOME_MRNA_SPLICING                                                                                                      | 104 | 0.0000 |
| REACTOME_MITOCHONDRIAL_PROTEIN_IMPORT                                                                                       | 47  | 0.0001 |
| KEGG_RNA_POLYMERASE                                                                                                         | 26  | 0.0002 |
| KEGG_PROTEIN_EXPORT                                                                                                         | 23  | 0.0002 |
| REACTOME_TRNA_AMINOACYLATION                                                                                                | 42  | 0.0003 |
| KEGG_AMINOACYL_TRNA_BIOSYNTHESIS                                                                                            | 41  | 0.0003 |
| REACTOME_CLEAVAGE_OF_GROWING_TRANSCRIPT_IN_THE_TERMINATION_REGION_                                                          | 40  | 0.0004 |
| REACTOME_TRANSPORT_OF_MATURE_TRANSCRIPT_TO_CYTOPLASM                                                                        | 50  | 0.0004 |
| KEGG_SPLICEOSOME                                                                                                            | 118 | 0.0004 |
| REACTOME_INTERACTIONS_OF_VPR_WITH_HOST_CELLULAR_PROTEINS                                                                    | 32  | 0.0004 |
| PID_CD8_TCR_PATHWAY                                                                                                         | 53  | 0.0006 |
| KEGG_T_CELL_RECEPTOR_SIGNALING_PATHWAY                                                                                      | 107 | 0.0007 |
| REACTOME_RESPIRATORY_ELECTRON_TRANSPORT_ATP_SYNTHESIS_BY_CHEMIOSMOTIC_COUPLING_AND_HEAT_PRODUCTION_BY_UNCOUPLING_PROTEINS_  | 85  | 0.0009 |
| BIOCARTA_TCRA_PATHWAY                                                                                                       | 11  | 0.0009 |
| REACTOME_RNA_POL_II_TRANSCRIPTION                                                                                           | 95  | 0.0009 |
| REACTOME_PURINE_RIBONUCLEOSIDE_MONOPHOSPHATE_BIOSYNTHESIS                                                                   | 11  | 0.0010 |
| KEGG_RNA_DEGRADATION                                                                                                        | 57  | 0.0015 |
| REACTOME_BIOSYNTHESIS_OF_THE_N_GLYCAN_PRECURSOR_DOLICHOL_LIPID_LINKED_OLIGOSACCHARIDE_LLO_AND_TRANSFER_TO_A_NASCENT_PROTEIN | 26  | 0.0016 |
| REACTOME_SLBP_DEPENDENT_PROCESSING_OF_REPLICATION_DEPENDENT_HISTONE_PRE_MRNAS                                               | 11  | 0.0024 |
| BIOCARTA_STATHMIN_PATHWAY                                                                                                   | 19  | 0.0033 |
| REACTOME_HIV_LIFE_CYCLE                                                                                                     | 110 | 0.0044 |
| REACTOME_NEP_NS2_INTERACTS_WITH_THE_CELLULAR_EXPORT_MACHINERY                                                               | 27  | 0.0046 |
| BIOCARTA_GPCR_PATHWAY                                                                                                       | 32  | 0.0046 |
| REACTOME_MRNA_3_END_PROCESSING                                                                                              | 31  | 0.0047 |
| BIOCARTA_CTLA4_PATHWAY                                                                                                      | 19  | 0.0050 |
| REACTOME_RESPIRATORY_ELECTRON_TRANSPORT                                                                                     | 68  | 0.0051 |
| REACTOME_TCA_CYCLE_AND_RESPIRATORY_ELECTRON_TRANSPORT                                                                       | 121 | 0.0052 |
| REACTOME_GENERATION_OF_SECOND_MESSENGER_MOLECULES                                                                           | 24  | 0.0059 |
| BIOCARTA_TOB1_PATHWAY                                                                                                       | 19  | 0.0059 |
| REACTOME_TRANSPORT_OF_MATURE_MRNA_DERIVED_FROM_AN_INTRONLESS_TRANSCRIPT                                                     | 32  | 0.0065 |
| REACTOME_PROCESSING_OF_CAPPED_INTRONLESS_PRE_MRNA                                                                           | 23  | 0.0069 |
| REACTOME_TCR_SIGNALING                                                                                                      | 49  | 0.0072 |
| REACTOME_LATE_PHASE_OF_HIV_LIFE_CYCLE                                                                                       | 97  | 0.0079 |
| BIOCARTA_CSK_PATHWAY                                                                                                        | 22  | 0.0087 |
| REACTOME_REGULATORY_RNA_PATHWAYS                                                                                            | 21  | 0.0088 |
