# Supplementary material for: Sarcoidosis activates diverse transcriptional programs in bronchoalveolar lavage cells
Source: PubMed Central journal article supplement (PMC4962428; doi:10.1186/s12931-016-0411-y), 2016-07-26
Supplement: 12931_2016_411_MOESM6_ESM.pdf [file 12931_2016_411_MOESM6_ESM.pdf]

**Additional file 6: Table S5. Subject demographics and BAL differential cell counts (sarcoidosis 2).**

| <b>Subject</b> | <b>Gender</b> | <b>Age</b> | <b>Race</b> | <b>Smoking</b> | <b>Mac (%)</b> | <b>Lymph (%)</b> | <b>Pmn (%)</b> | <b>Eos (%)</b> |
|----------------|---------------|------------|-------------|----------------|----------------|------------------|----------------|----------------|
| Sarc 16        | F             | 57         | C           | Former         | 69             | 15               | 14             | 2              |
| Sarc 17        | F             | 44         | AA          | Never          | 86             | 11               | 3              | 0              |
| Sarc 18        | F             | 27         | C           | Smoker         | 95             | 1                | 4              | 0              |
| Sarc 19        | F             | 46         | C           | Former         | 93             | 4                | 3              | 0              |
| Sarc 20        | M             | 59         | AA          | Former         | 78             | 10               | 8              | 4              |
| Sarc 21        | F             | 24         | AA          | Smoker         | 90             | 9                | 1              | 0              |
| Sarc 22        | F             | 37         | AA          | Former         | 89             | 7                | 4              | 0              |
| Sarc 23        | F             | 44         | AA          | Never          | 79             | 21               | 0              | 0              |
| Sarc 24        | M             | 49         | C           | Never          | 95             | 5                | 0              | 0              |
| Sarc 25        | F             | 48         | AA          | Never          | 100            | 0                | 0              | 0              |

Sarc: sarcoidosis patient; AA: African American; C: Caucasian; Mac: macrophage; Lymph: lymphocyte; Pmn: polymorphonuclear cell; Eos: eosinophil.
